# Supplementary material for: The Three Faces of Riboviral Spontaneous Mutation: Spectrum, Mode of Genome Replication, and Mutation Rate
Source: PLoS Genet. 2012 Jul 26;8(7):e1002832. doi: 10.1371/journal.pgen.1002832 (PMC3405988; doi:10.1371/journal.pgen.1002832)
Supplement: Table S2 — Primers and PCR cycling parameters for amplifying and sequencing. (DOC) [file pgen.1002832.s004.doc]

**Table S2.** Primers and PCR cycling parameters for amplifying and sequencing.

| **RT and PCR reactions** | | | |  | **Sequencing** | |
| --- | --- | --- | --- | --- | --- | --- |
| Primer | Primer sequence | PCR | Product |  | Primer | Primer sequence |
| namea | (5→3) | parametersb | length (bp) |  | namea | (5→3) |
| RT_AmpR | acttctcccaggcaacagctt | Annealing: | 1415 |  | RT_SeqF1 | ATTAACCCAACGCGTAAAGC |
| RT_AmpF | GCAATCTTCCGTTCGCTACAC | 68 ºC, 1 min |  |  | RT_SeqF2 | CGCAGTATAGTACCGATGAGG |
|  |  | Extension: |  |  | RT_SeqF3 | CGGCTTAGTTATACCACGTTC |
|  |  | 72 ºC, 2 min |  |  | RT_SeqR1 | GAGAGAGTTACGCGAAGATGC |
|  |  |  |  |  | RT_SeqR2 | GTCGCATCAAGGTCAATATAA |
|  |  |  |  |  | RT_SeqR3 | TCGGTACTATACTGCGTGAAC |
|  |  |  |  |  |  |  |
| ßsub_AmpF1 | CCGATGGCGTGATAGTTG | Annealing: | 1887 |  | ßsub_SeqF1 | GTGCCATACCGTTTGACTTC |
| ßsub_AmpR1 | TCGTGCCCTGGAAGACC | 65 ºC, 1 min |  |  | ßsub_SeqF2 | CTCGGGCTTTGAAGTATGTTTTAG |
|  |  | Extension: |  |  | ßsub_SeqF3 | GGAAGTTTTTAAGTATGTTGGTTT |
|  |  | 72 ºC, 2 min |  |  | ßsub_SeqR1 | CCGTAGGGTGCCAGAAC |
|  |  |  |  |  | ßsub_SeqR2 | AAACCAACATACTTAAAAACTTCC |
|  |  |  |  |  | ßsub_SeqR3 | CTGATATCGAAATGTGTAGAAGC |
|  |  |  |  |  |  |  |
| ßsub_AmpF2 | GCGGCAAGCACTACTATTCT | Annealing: | 655 |  | ßsub_SeqF4 | ACCTCTTCTCGCGTTGTCTCT |
| ßsub_AmpR2 | GATCCCCCTCTCACTCGT | 62 ºC, 1 min |  |  |  |  |
|  |  | Extension: |  |  |  |  |
|  |  | 72 ºC, 1 min |  |  |  |  |

aThe RT primers were used for the mutation reporter and the ßsub primers were used for the Qß replicase.

bThe remaining parameters were as specified by the PfuTurbo DNA polymerase manufacturer’s instructions. In all cases, the second segment of the PCR was cycled 35 times.
